# Supplementary material
Source: MDPI journal article supplement (https://www.mdpi.com/2311-5637/7/3/171)
Supplement: s1 [file s1]

**Table S1.** Summary of commercial non-*Saccharomyces* yeasts datasheets available on the market. Information obtained from the website of the companies that commercialize them (“commercial website”) for winemaking.

| Yeast Specie                   | Brand Format *<br>(Company)                | Ethanol Tolerance<br>(% v/v) | Impact on the Aromatic Profile                                                                                                                                                                                                                                                                                                                                      | Other Contributions to the Wine                                                                                                                                                                 | Commercial Website                                                                                                                                                                        |
|--------------------------------|--------------------------------------------|------------------------------|---------------------------------------------------------------------------------------------------------------------------------------------------------------------------------------------------------------------------------------------------------------------------------------------------------------------------------------------------------------------|-------------------------------------------------------------------------------------------------------------------------------------------------------------------------------------------------|-------------------------------------------------------------------------------------------------------------------------------------------------------------------------------------------|
| <i>Torulaspora delbrueckii</i> | <b>Biodiva TD291</b><br>ADY<br>(Lallemand) | 10.0                         | <ul style="list-style-type: none"> <li>Higher content of esters, terpenes and thiols.</li> <li>Low production of volatile acidity, acetaldehyde.</li> </ul>                                                                                                                                                                                                         | <ul style="list-style-type: none"> <li>High production of glycerol.</li> <li>Osmophilic yeast (late harvest and ice wines).</li> <li>High production of polysaccharides: mouth-feel.</li> </ul> | <a href="https://www.lallemand-wine.com/en/north-america/products/catalogue/">https://www.lallemand-wine.com/en/north-america/products/catalogue/</a>                                     |
| <i>Torulaspora delbrueckii</i> | <b>Prelude</b><br>ADY<br>(CHR Hansen)      | 9.0                          | <ul style="list-style-type: none"> <li>Higher intensity and aromatic complexity.</li> <li>High production of medium-chain fatty-acid esters (more stable esters).</li> <li>Improvement of fruit flavors (thiols, esters).</li> <li>Low production of volatile phenols, volatile acidity, acetaldehyde, H<sub>2</sub>S.</li> </ul>                                   | <ul style="list-style-type: none"> <li>High production of polysaccharides: mouth-feel.</li> </ul>                                                                                               | <a href="https://www.rjoenology.com/ft_en/Yeast%20strains/PREL-UDE%20PDS%20July%202010.pdf">https://www.rjoenology.com/ft_en/Yeast%20strains/PREL-UDE%20PDS%20July%202010.pdf</a>         |
| <i>Torulaspora delbrueckii</i> | <b>Zymaflore Alpha</b><br>ADY<br>(Laffort) | 10.0                         | <ul style="list-style-type: none"> <li>Co-fermentation with <i>S. cerevisiae</i>: <ul style="list-style-type: none"> <li>higher expression of thiols 3SH and A3SH.</li> <li>higher production of 2-phenylethanol and esters.</li> </ul> </li> <li>Low production of volatile phenols, volatile acidity, acetaldehyde, acetoin, diacetyl, H<sub>2</sub>S.</li> </ul> |                                                                                                                                                                                                 | <a href="https://laffort.com/es/productos/zymaflore-alpha/">https://laffort.com/es/productos/zymaflore-alpha/</a>                                                                         |
| <i>Torulaspora delbrueckii</i> | <b>Viniferm NSTD</b><br>ADY<br>(Agrovin)   | 9.5                          | <ul style="list-style-type: none"> <li>Higher expression of thiols: grapefruit, boxwood.</li> <li>Higher flowery aroma: 2-phenylethanol.</li> <li>Low production of volatile acidity, acetaldehyde, acetoin, H<sub>2</sub>S.</li> </ul>                                                                                                                             | <ul style="list-style-type: none"> <li>High production of polysaccharides: mouth-feel.</li> <li>Co-fermentation with <i>S. cerevisiae</i>: lower alcohol content.</li> </ul>                    | <a href="https://www.agrovin.com/producto/viniferm-nstd/">https://www.agrovin.com/producto/viniferm-nstd/</a>                                                                             |
| <i>Torulaspora delbrueckii</i> | <b>EnartisFerm Qt</b><br>ADY<br>(Enartis)  | 10.0                         | <ul style="list-style-type: none"> <li>Contribution of fruity aromas (esters).</li> <li>Low production of volatile acidity, H<sub>2</sub>S.</li> </ul>                                                                                                                                                                                                              | <ul style="list-style-type: none"> <li>Osmophilic yeast (high sugar grape must).</li> </ul>                                                                                                     | <a href="https://www.enartis.com/it/prodotti/vino/lieviti/non-saccharomyces/enartisferm-q-tau/">https://www.enartis.com/it/prodotti/vino/lieviti/non-saccharomyces/enartisferm-q-tau/</a> |

|                                 |                                                           |               |                                                                                                                                                                                                                                                   |                                                                                                                                                                                                                                                                                                                                  |                                                                                                                                                                                                                   |
|---------------------------------|-----------------------------------------------------------|---------------|---------------------------------------------------------------------------------------------------------------------------------------------------------------------------------------------------------------------------------------------------|----------------------------------------------------------------------------------------------------------------------------------------------------------------------------------------------------------------------------------------------------------------------------------------------------------------------------------|-------------------------------------------------------------------------------------------------------------------------------------------------------------------------------------------------------------------|
| <i>Torulaspora delbrueckii</i>  | <b>EnartisFerm Qt</b><br>Liquido<br>CRY<br>(Enartis)      | 12.0          | <ul style="list-style-type: none"> <li>• Contribution of fruity aromas (esters).</li> <li>• Low production of volatile acidity, H<sub>2</sub>S.</li> </ul>                                                                                        | <ul style="list-style-type: none"> <li>• Increasing of mouth-feel: high production of glycerol and polysaccharides.</li> <li>• Osmophilic yeast (high sugar grape must).</li> <li>• Capacity to ferment in monoculture.</li> <li>• Improvement of foam persistence (Hs) in base wine (sparkling winemaking).</li> </ul>          | <a href="https://www.enartis.com/it/prodotti/vino/lieviti/lieviti-liquidi/enartisferm-q%CF%84-liquido/">https://www.enartis.com/it/prodotti/vino/lieviti/lieviti-liquidi/enartisferm-q%CF%84-liquido/</a>         |
| <i>Torulaspora delbrueckii</i>  | <b>Oenovin Torulaspora BIO</b><br>ADY<br>(Oeno)           | Not available | <ul style="list-style-type: none"> <li>• Contribution of fruity aromas. Red fruit.</li> <li>• Low production of volatile acidity.</li> </ul>                                                                                                      |                                                                                                                                                                                                                                                                                                                                  | <a href="https://www.oeno.it/wp-content/uploads/ST-Oenovin-Torulaspora-Oeno-BIO-2018-rev1.pdf">https://www.oeno.it/wp-content/uploads/ST-Oenovin-Torulaspora-Oeno-BIO-2018-rev1.pdf</a>                           |
| <i>Torulaspora delbrueckii</i>  | <b>Torulaspora delbrueckii</b><br>FLY<br>(Probiotec)      | 9.5           | <ul style="list-style-type: none"> <li>• Higher flowery aroma: 2-phenylethanol.</li> <li>• Low production of volatile acidity, acetaldehyde.</li> <li>• No production of H<sub>2</sub>S.</li> </ul>                                               | High production of glycerol: mouth-feel.                                                                                                                                                                                                                                                                                         | <a href="https://www.probiotec.it/schede/Torulaspora-delbrueckii.pdf">https://www.probiotec.it/schede/Torulaspora-delbrueckii.pdf</a>                                                                             |
| <i>Torulaspora delbrueckii</i>  | <b>Torulaspora delbrueckii 12.2</b><br>FLY<br>(Probiotec) | 11.5          | <ul style="list-style-type: none"> <li>• Higher flowery aroma: 2-phenylethanol.</li> <li>• Low production of volatile acidity, acetaldehyde.</li> <li>• No production of H<sub>2</sub>S.</li> </ul>                                               | <ul style="list-style-type: none"> <li>• High production of glycerol: mouth-feel.</li> <li>• Capacity to ferment in monoculture.</li> <li>• Ability to second fermentation in sparkling wines.</li> </ul>                                                                                                                        | <a href="https://www.probiotec.it/schede/Torulaspora-delbrueckii-12.2.pdf">https://www.probiotec.it/schede/Torulaspora-delbrueckii-12.2.pdf</a>                                                                   |
| <i>Lachancea thermotolerans</i> | <b>Laktia</b><br>ADY<br>(Lallemand)                       | 10.0          | <ul style="list-style-type: none"> <li>• Higher aromatic complexity.</li> <li>• Low production of volatile acidity.</li> </ul>                                                                                                                    | <ul style="list-style-type: none"> <li>• High production of glycerol.</li> <li>• High lactic acid production: acidity + freshness.</li> <li>• Biocompatible for co-inoculation with malolactic bacteria (malolactic fermentation, MLF).</li> </ul>                                                                               | <a href="https://www.lallemand-wine.com/en/north-america/products/catalogue/wine-yeasts/109/level2-laktia/">https://www.lallemand-wine.com/en/north-america/products/catalogue/wine-yeasts/109/level2-laktia/</a> |
| <i>Lachancea thermotolerans</i> | <b>Concerto</b><br>ADY<br>(CHR Hansen)                    | 10.0          | <ul style="list-style-type: none"> <li>• Higher intensity and aromatic complexity.</li> <li>• Integration of red fruit (strawberry), black fruit, spices.</li> <li>• Low production of volatile acidity, acetaldehyde, H<sub>2</sub>S.</li> </ul> | <ul style="list-style-type: none"> <li>• High lactic acid production: acidity + freshness.</li> <li>• Biocompatible for co-inoculation with malolactic bacteria (MLF).</li> <li>• Production of polysaccharides: mouth-feel.</li> <li>• More rounded and smoother mouthfeel.</li> </ul>                                          | <a href="https://www.gusmer-wine.com/catalog/chr-hansen-yeast/concerto/">https://www.gusmer-wine.com/catalog/chr-hansen-yeast/concerto/</a>                                                                       |
| <i>Lachancea thermotolerans</i> | <b>Octave</b><br>ADY<br>(CHR Hansen)                      | 11.0          | <ul style="list-style-type: none"> <li>• Esters: enhance fruit flavors. Stone fruits (peach, apricots) and pear notes.</li> <li>• Low production of acetic acid, phenols, H<sub>2</sub>S.</li> </ul>                                              | <ul style="list-style-type: none"> <li>• Capacity to increase the lactic acid content: increased acidity and pH reduction.</li> <li>• Reduction of alcohol content.</li> <li>• Bioprotection in the pre-fermentative stage.</li> <li>• Reduction of SO<sub>2</sub> added dose.</li> <li>• Disadvantage: Inhibits MLF.</li> </ul> | <a href="https://www.gusmer-wine.com/catalog/chr-hansen-yeast/octave/">https://www.gusmer-wine.com/catalog/chr-hansen-yeast/octave/</a>                                                                           |

|                                  |                                                           |               |                                                                                                                                                                                                           |                                                                                                                                                                                                                               |                                                                                                                                                                                                                                                                                               |
|----------------------------------|-----------------------------------------------------------|---------------|-----------------------------------------------------------------------------------------------------------------------------------------------------------------------------------------------------------|-------------------------------------------------------------------------------------------------------------------------------------------------------------------------------------------------------------------------------|-----------------------------------------------------------------------------------------------------------------------------------------------------------------------------------------------------------------------------------------------------------------------------------------------|
| <i>Lachancea thermotolerans</i>  | <b>EnartisFerm Qk</b><br>CRY<br>(Enartis)                 | 8.0           | <ul style="list-style-type: none"> <li>Higher production of 2-phenylethanol (rose, flower).</li> <li>Low production of volatile acidity.</li> </ul>                                                       | <ul style="list-style-type: none"> <li>Capacity to increase the lactic acid content: increased acidity and pH reduction.</li> <li>Reduction of alcohol content.</li> <li>High production of glycerol.</li> </ul>              | <a href="https://www.enartis.com/it/prodotti/vino/lieviti/lieviti-liquidi/enartisferm-q%26%99/">https://www.enartis.com/it/prodotti/vino/lieviti/lieviti-liquidi/enartisferm-q%26%99/</a>                                                                                                     |
| <i>Lachancea thermotolerans</i>  | <b>Excellence X'Fresh</b><br>ADY<br>(Lamothe-Abiet)       | Not available | More “fresh and fruity” aromatic profile.                                                                                                                                                                 | <ul style="list-style-type: none"> <li>Capacity to increase the lactic acid content: increased acidity and pH reduction.</li> <li>Reduction of alcohol content.</li> </ul>                                                    | <a href="https://lamothe-abiet.com/es/levaduras/excellence-x-fresh/">https://lamothe-abiet.com/es/levaduras/excellence-x-fresh/</a>                                                                                                                                                           |
| <i>Lachancea thermotolerans</i>  | <b>LEVULIA Al-comeno</b><br>ADY<br>(AEB)                  | 7.2           | Low production of volatile acidity.                                                                                                                                                                       | <ul style="list-style-type: none"> <li>Capacity to increase the lactic acid content: increased acidity and pH reduction.</li> <li>Reduction of alcohol content.</li> <li>More freshness and balance on the palate.</li> </ul> | <a href="https://www.aeb-group.com/es/levulia-alcomeno-11434">https://www.aeb-group.com/es/levulia-alcomeno-11434</a>                                                                                                                                                                         |
| <i>Lachancea thermotolerans</i>  | <b>Kluyveromyces thermotolerans</b><br>FLY<br>(Probiotec) | 8.0           | <ul style="list-style-type: none"> <li>Higher production of 2-phenylethanol (rose, flower).</li> <li>Low production of acetaldehyde.</li> </ul>                                                           | <ul style="list-style-type: none"> <li>Capacity to increase the lactic acid content: increased acidity and pH reduction.</li> <li>High production of glycerol.</li> </ul>                                                     | <a href="https://www.probiotec.it/schede/Kluyveromyces-thermotolerans.pdf">https://www.probiotec.it/schede/Kluyveromyces-thermotolerans.pdf</a>                                                                                                                                               |
| <i>Metschnikowia pulcherrima</i> | <b>Flavia MP346</b><br>ADY<br>(Lallemand)                 | Not available | <ul style="list-style-type: none"> <li>Higher expression of terpenes and thiols (<math>\alpha</math>-arabinofuranosidase activity).</li> <li>Low production of volatile acidity, acetaldehyde.</li> </ul> | <ul style="list-style-type: none"> <li>More perception of acidity and freshness.</li> <li>Polysaccharides releasing and early autolysis: mouth-feel.</li> </ul>                                                               | <a href="https://www.lallemand-wine.com/en/north-america/products/catalogue/wine-yeasts/56/level2-flavia/">https://www.lallemand-wine.com/en/north-america/products/catalogue/wine-yeasts/56/level2-flavia/</a>                                                                               |
| <i>Metschnikowia pulcherrima</i> | <b>Oenoferm MProtect</b><br>ADY<br>(Erbslöh)              | 6.0           | <ul style="list-style-type: none"> <li>Low production of acetic acid and ethyl acetate.</li> <li>Prevention of off-flavours.</li> </ul>                                                                   | <ul style="list-style-type: none"> <li>Biocontrol of spontaneous grape microbiota.</li> <li>Reduction of SO<sub>2</sub> added dose.</li> </ul>                                                                                | <a href="https://erbsloeh.com/fileadmin/user_upload/pdf/Wine/technical_data_sheet/GB/oenoferm_mprotect-technical_data_sheet-english-erbsloeh.pdf">https://erbsloeh.com/fileadmin/user_upload/pdf/Wine/technical_data_sheet/GB/oenoferm_mprotect-technical_data_sheet-english-erbsloeh.pdf</a> |
| <i>Metschnikowia pulcherrima</i> | <b>AWRI Obsession</b><br>ADY<br>(AB Biotek)               | 7.0           | <ul style="list-style-type: none"> <li>Improvement of dark fruit flavour.</li> <li>Capability to mask green characters.</li> <li>Low production of volatile acidity.</li> </ul>                           | Increasing of colour and complexity in red wines.                                                                                                                                                                             | <a href="https://www.abbiotek.com/perch/resources/next-generation-awri-obsession-product-information-may-2019-web.pdf">https://www.abbiotek.com/perch/resources/next-generation-awri-obsession-product-information-may-2019-web.pdf</a>                                                       |

|                                  |                                                      |                        |                                                                                                                                                                                                                                                                                                        |                                                                                                                                                                                                                                                      |                                                                                                                                                                                               |
|----------------------------------|------------------------------------------------------|------------------------|--------------------------------------------------------------------------------------------------------------------------------------------------------------------------------------------------------------------------------------------------------------------------------------------------------|------------------------------------------------------------------------------------------------------------------------------------------------------------------------------------------------------------------------------------------------------|-----------------------------------------------------------------------------------------------------------------------------------------------------------------------------------------------|
| <i>Metschnikowia pulcherrima</i> | <b>LEVULIA Pulcherrima</b><br>ADY<br>(AEB)           | 11.5                   | <ul style="list-style-type: none"> <li>• Monoculture: Increase of higher alcohols and terpenes.</li> <li>• Co-cultivation: Increase of higher alcohols, ethyl esters, phenyl-acetate, isoamyl-acetate and terpenes.</li> <li>• Low production of volatile acidity.</li> </ul>                          | <ul style="list-style-type: none"> <li>• Capacity to ferment in monoculture.</li> <li>• Capacity to finish the fermentative process.</li> </ul>                                                                                                      | <a href="https://www.aeb-group.com/es/levulia-pulcherrima-10586">https://www.aeb-group.com/es/levulia-pulcherrima-10586</a>                                                                   |
| <i>Metschnikowia pulcherrima</i> | <b>Primaflora VB BIO</b><br>ADY<br>(AEB)             | Pre-fermentative phase | <ul style="list-style-type: none"> <li>• Preservation of enzymes.</li> <li>• Contributes to the flavor and aromatic complexity.</li> <li>• Prevention of off-flavours: H<sub>2</sub>S, butyric odors, volatile phenols, acetic acid, etc.</li> <li>• Less extraction of unpleasant flavors.</li> </ul> | <ul style="list-style-type: none"> <li>• Lower production of biogenic amines.</li> <li>• Bioprotection in the pre-fermentative stage.</li> <li>• Reduction of SO<sub>2</sub> added dose.</li> </ul>                                                  | <a href="https://www.aeb-group.com/es/primaflora-vb-bio-10541">https://www.aeb-group.com/es/primaflora-vb-bio-10541</a>                                                                       |
| <i>Metschnikowia pulcherrima</i> | <b>Excellence B-Nature</b><br>ADY<br>(Lamothe-Abiet) | Pre-fermentative phase | Improvement of the aromatic complexity.                                                                                                                                                                                                                                                                | <ul style="list-style-type: none"> <li>• Bioprotection in the pre-fermentative stage.</li> <li>• Reduction of SO<sub>2</sub> added dose.</li> </ul>                                                                                                  | <a href="https://lamothe-abiet.com/es/levaduras/excellence-b-nature/">https://lamothe-abiet.com/es/levaduras/excellence-b-nature/</a>                                                         |
| <i>Metschnikowia fructicola</i>  | <b>Levia Nature</b><br>ADY<br>(Oeno)                 | Pre-fermentative phase | Low production of volatile acidity.                                                                                                                                                                                                                                                                    | <ul style="list-style-type: none"> <li>• Bioprotection in the pre-fermentative stage.</li> <li>• Reduction of SO<sub>2</sub> added dose.</li> <li>• Facilitates the implantation of <i>S. cerevisiae</i>.</li> </ul>                                 | <a href="https://www.oeno.it/prodotto/levia-nature/">https://www.oeno.it/prodotto/levia-nature/</a>                                                                                           |
| <i>Metschnikowia fructicola</i>  | <b>Gaia</b><br>ADY<br>(Lallemand)                    | Pre-fermentative phase | <ul style="list-style-type: none"> <li>• Improvement of the sensory expression and preserving varietal character.</li> <li>• Low production of volatile acidity.</li> </ul>                                                                                                                            | <ul style="list-style-type: none"> <li>• Competitive factor: active K2 (bioprotection in the pre-fermentative stage).</li> <li>• Reduction of SO<sub>2</sub> added dose.</li> <li>• Facilitates the implantation of <i>S. cerevisiae</i>.</li> </ul> | <a href="https://www.lallemand-wine.com/en/north-america/products/catalogue/wine-yeasts/103/gaa/">https://www.lallemand-wine.com/en/north-america/products/catalogue/wine-yeasts/103/gaa/</a> |
| <i>Wickerhamomyces anomalus</i>  | <b>Anti Brett 1</b><br>FLY<br>(Probiotec)            | 4.0                    | <ul style="list-style-type: none"> <li>• No production of acetic acid.</li> <li>• Low production of H<sub>2</sub>S.</li> </ul>                                                                                                                                                                         | <ul style="list-style-type: none"> <li>• Active mycocin against <i>Brettanomyces</i>.</li> <li>• Synergy with <i>Kluyveromyces wickerhamii</i>.</li> </ul>                                                                                           | <a href="http://www.probiotec.it/schede/anti-brett-1.pdf">http://www.probiotec.it/schede/anti-brett-1.pdf</a>                                                                                 |
| <i>Kluyveromyces wickerhamii</i> | <b>Anti Brett 2</b><br>FLY<br>(Probiotec)            | 2.0                    | <ul style="list-style-type: none"> <li>• No production of acetic acid.</li> <li>• Low production of H<sub>2</sub>S.</li> </ul>                                                                                                                                                                         | <ul style="list-style-type: none"> <li>• Active mycocin against <i>Brettanomyces</i>.</li> <li>• Synergy with <i>Wickerhamomyces anomalus</i>.</li> </ul>                                                                                            | <a href="https://www.probiotec.it/schede/anti-brett-2.pdf">https://www.probiotec.it/schede/anti-brett-2.pdf</a>                                                                               |

|                                     |                                                                    |               |                                                                                                                                                                         |                                                                                                                                                                                                                                                                                                         |                                                                                                                                                                                                                                                                                                   |
|-------------------------------------|--------------------------------------------------------------------|---------------|-------------------------------------------------------------------------------------------------------------------------------------------------------------------------|---------------------------------------------------------------------------------------------------------------------------------------------------------------------------------------------------------------------------------------------------------------------------------------------------------|---------------------------------------------------------------------------------------------------------------------------------------------------------------------------------------------------------------------------------------------------------------------------------------------------|
| <i>Schizosaccharomyces pombe</i>    | <b>Atecrem 12H</b><br>CRY<br>(BioEnologia)                         | 14.0          | Low production of acetic acid, volatile acidity.                                                                                                                        | <ul style="list-style-type: none"> <li>• Malic acid degradation.</li> <li>• Gluconic acid degradation.</li> <li>• High production of glycerol (until 15 g/L).</li> <li>• High production of polysaccharides.</li> <li>• Production of vitisin A.</li> <li>• Reduction of ochratoxin A (OTA).</li> </ul> | <a href="https://www.bioenologia.com/vino/atecrem-12h">https://www.bioenologia.com/vino/atecrem-12h</a>                                                                                                                                                                                           |
| <i>Schizosaccharomyces pombe</i>    | <b>Promalic</b><br>ENCY<br>(Proenol)                               | Not available | Improvement of the freshness and aromatic profile.                                                                                                                      | <ul style="list-style-type: none"> <li>• Malic acid degradation.</li> <li>• No contact between yeast and must/wine.</li> <li>• Easy removal of encapsulated yeast after deacidification process.</li> </ul>                                                                                             | <a href="https://www.proenol.com/web/productos/leveduras-encapsuladas/promalic-detail">https://www.proenol.com/web/productos/leveduras-encapsuladas/promalic-detail</a>                                                                                                                           |
| <i>Starmerella bacillaris</i>       | <b>Atecrem 11H</b><br>CRY<br>(BioEnologia)                         | 10.0          | Middle production of volatile acidity.                                                                                                                                  | High production of glycerol (until 14 g/L).                                                                                                                                                                                                                                                             | <a href="https://www.bioenologia.com/vino/atecrem-11h">https://www.bioenologia.com/vino/atecrem-11h</a>                                                                                                                                                                                           |
| <i>Zygosaccharomyces bailii</i>     | <b>Fructoferm W3</b><br>ADY<br>(Lallemand)                         | 14.7          |                                                                                                                                                                         | Fructophilic yeast for the treatment of stuck fermentations (Sütterlin, 2010).                                                                                                                                                                                                                          | <a href="https://www.yumpu.com/de/document/read/36907518/fructoferm-w3">https://www.yumpu.com/de/document/read/36907518/fructoferm-w3</a>                                                                                                                                                         |
| <i>Zygosaccharomyces parabailii</i> | <b>Hardened Spaniard</b><br>FLY<br>(Mainiacal Yeast)               |               | It lends notes of fresh cut apples and earthy/hazelnut like flavors.                                                                                                    | “Flower-film yeast” for Sherry wines.                                                                                                                                                                                                                                                                   | <a href="https://www.mainiacal.com/pro-brewers">https://www.mainiacal.com/pro-brewers</a>                                                                                                                                                                                                         |
| <i>Pichia kluyveri</i>              | <b>Frootzen</b><br>AFY<br>(CHR Hansen)                             | 5.0           | <ul style="list-style-type: none"> <li>• Expression of thiols 3SH and A3SH.</li> <li>• Low production of volatile phenols, volatile acidity, H<sub>2</sub>S.</li> </ul> |                                                                                                                                                                                                                                                                                                         | <a href="https://www.chr-hansen.com/es/food-cultures-and-enzymes/fermented-beverages/cards/product-cards/frootzen-first-ever-pichia-kluyveri-yeast">https://www.chr-hansen.com/es/food-cultures-and-enzymes/fermented-beverages/cards/product-cards/frootzen-first-ever-pichia-kluyveri-yeast</a> |
| <i>Pichia kluyveri</i>              | <b>Pichia kluyveri</b><br><b>MIP-001</b><br>FLY<br>(Propagate Lab) | Low tolerant  |                                                                                                                                                                         | According to the technical datasheet, is a yeast strain commonly found in wine.                                                                                                                                                                                                                         | <a href="https://www.propagate-lab.com/pichia-kluyveri">https://www.propagate-lab.com/pichia-kluyveri</a>                                                                                                                                                                                         |

|                                                                               |                                                     |                        |                                                                                                                                                                                                                                                                                                           |                                                                                                                                                                                                                  |                                                                                                                                                                                                                                                                                                               |
|-------------------------------------------------------------------------------|-----------------------------------------------------|------------------------|-----------------------------------------------------------------------------------------------------------------------------------------------------------------------------------------------------------------------------------------------------------------------------------------------------------|------------------------------------------------------------------------------------------------------------------------------------------------------------------------------------------------------------------|---------------------------------------------------------------------------------------------------------------------------------------------------------------------------------------------------------------------------------------------------------------------------------------------------------------|
| <i>Pichia kluyveri</i> ,<br><i>Kazachastania</i><br><i>servazzii</i>          | <b>Trillyeast</b><br>CRY<br>(BioEnologia)           | 2.0                    | <ul style="list-style-type: none"> <li>High production of esters: rose, peach, pear and apple.</li> <li>Strong notes of olea fragrans and licorice.</li> </ul>                                                                                                                                            | High production of glycerol.                                                                                                                                                                                     | <a href="https://www.bioenologia.com/vino/trillyeast">https://www.bioenologia.com/vino/trillyeast</a>                                                                                                                                                                                                         |
| <i>Torulaspora delbrueckii</i> + <i>Saccharomyces cerevisiae</i>              | <b>Oenoferm Wild &amp; Pure</b><br>ADY<br>(Erbslöh) | Not available          | <ul style="list-style-type: none"> <li>Production of fruity esters.</li> <li>Higher expression of terpenes.</li> <li>Support the ripe and exotic fruit aroma.</li> </ul>                                                                                                                                  | Creamier, long-lasting, pleasant flavour and mouth-feel.                                                                                                                                                         | <a href="https://erbsloeh.com/fileadmin/user_upload/pdf/Wine/technical_data_sheet/GB/oenoferm_wild_and_pure_f3-technical_data_sheet-english-erbsloeh.pdf">https://erbsloeh.com/fileadmin/user_upload/pdf/Wine/technical_data_sheet/GB/oenoferm_wild_and_pure_f3-technical_data_sheet-english-erbsloeh.pdf</a> |
| <i>Torulaspora delbrueckii</i> + <i>Saccharomyces cerevisiae</i>              | <b>New Nordic Ale Yeast</b><br>FLY<br>(White Labs)  | 10.0                   |                                                                                                                                                                                                                                                                                                           | The technical datasheet only mentions its use in white and red winemaking.                                                                                                                                       | <a href="https://www.whitelabs.com/yeast-single?id=177&amp;type=YEAST">https://www.whitelabs.com/yeast-single?id=177&amp;type=YEAST</a>                                                                                                                                                                       |
| <i>Torulaspora delbrueckii</i> + <i>Metschnikowia pulcherrima</i>             | <b>Zymaflore Égide</b><br>ADY<br>(Laffort)          | Pre-fermentative phase |                                                                                                                                                                                                                                                                                                           | <ul style="list-style-type: none"> <li>Bioprotection in the pre-fermentative stage).</li> <li>Reduction of SO<sub>2</sub> added dose.</li> <li>Facilitates the implantation of <i>S. cerevisiae</i>.</li> </ul>  | <a href="https://laffort.com/es/productos/zymaflore-egide/">https://laffort.com/es/productos/zymaflore-egide/</a>                                                                                                                                                                                             |
| <i>Metschnikowia pulcherrima</i> + <i>Saccharomyces cerevisiae</i>            | <b>Primaflora VR BIO</b><br>ADY<br>(AEB)            | Pre-fermentative phase | <ul style="list-style-type: none"> <li>Preservation of enzymes.</li> <li>Contributes to the flavor and aromatic complexity.</li> <li>Prevention of off-flavours: butyric odors.</li> <li>Less extraction of unpleasant flavors.</li> </ul>                                                                | <ul style="list-style-type: none"> <li>Lower production of biogenic amines and acetamides.</li> <li>Bioprotection in the pre-fermentative stage).</li> <li>Reduction of SO<sub>2</sub> added dose.</li> </ul>    | <a href="https://www.aeb-group.com/es/primaflorasupsup-vr-bio-10555">https://www.aeb-group.com/es/primaflorasupsup-vr-bio-10555</a>                                                                                                                                                                           |
| <i>Lachancea thermotolerans</i> + <i>Saccharomyces cerevisiae</i>             | <b>Symphony</b><br>ADY<br>(CHR Hansen)              | 16.0                   | <ul style="list-style-type: none"> <li>Enhancement of fruity flavors: thiols and esters.</li> <li>White wines: floral aroma, tropical fruity notes.</li> <li>Red wines: complex and round flavors.</li> <li>Low production of acetic acid, volatile acidity, volatile phenols, H<sub>2</sub>S.</li> </ul> | <ul style="list-style-type: none"> <li>Limited lactic acid production from sugars.</li> <li>Biocompatible with malolactic bacteria.</li> </ul>                                                                   | <a href="https://irp-cdn.multiscreensite.com/747494ab/files/uploaded/16-CHR-yeast%20Viniflora%20Symphony%20TDS.pdf">https://irp-cdn.multiscreensite.com/747494ab/files/uploaded/16-CHR-yeast%20Viniflora%20Symphony%20TDS.pdf</a>                                                                             |
| <i>Lachancea thermotolerans</i> (40%) + <i>Saccharomyces cerevisiae</i> (60%) | <b>Rhythm</b><br>ADY<br>(CHR Hansen)                | 17.0                   | <ul style="list-style-type: none"> <li>Improvement of fruity flavors: thiols and esters.</li> <li>Low levels of acetic acid, volatile acidity, volatile phenols, H<sub>2</sub>S.</li> </ul>                                                                                                               | <ul style="list-style-type: none"> <li>Lactic acid production from sugars.</li> <li>Enhancement of complexity and mouth-feel. Improve palate weight.</li> <li>Biocompatible with malolactic bacteria.</li> </ul> | <a href="https://www.gusmerwine.com/catalog/chr-hansen-yeast/rhythm/">https://www.gusmerwine.com/catalog/chr-hansen-yeast/rhythm/</a>                                                                                                                                                                         |

|                                                                                                                      |                                       |      |                                                                                                                                                                                                                                                                                                               |                                                                                                                                                           |                                                                                                                                                                                           |
|----------------------------------------------------------------------------------------------------------------------|---------------------------------------|------|---------------------------------------------------------------------------------------------------------------------------------------------------------------------------------------------------------------------------------------------------------------------------------------------------------------|-----------------------------------------------------------------------------------------------------------------------------------------------------------|-------------------------------------------------------------------------------------------------------------------------------------------------------------------------------------------|
| <i>Lachancea thermotolerans</i> (10%) + <i>Torulaspora delbrueckii</i> (10%) + <i>Saccharomyces cerevisiae</i> (80%) | <b>Harmony</b><br>ADY<br>(CHR Hansen) | 17.0 | <ul style="list-style-type: none"> <li>• Improvement of fruity flavors: thiols and esters.</li> <li>• Low levels of acetic acid, volatile acidity, volatile phenols, H<sub>2</sub>S.</li> </ul>                                                                                                               | <ul style="list-style-type: none"> <li>• Middle production of polysaccharides.</li> <li>• Biocompatible with malolactic bacteria.</li> </ul>              | <a href="https://www.gusmer-wine.com/catalog/chr-hansen-yeast/harmony/">https://www.gusmer-wine.com/catalog/chr-hansen-yeast/harmony/</a>                                                 |
| <i>Lachancea thermotolerans</i> + <i>Torulaspora delbrueckii</i> + <i>Saccharomyces cerevisiae</i>                   | <b>Melody</b><br>ADY<br>(CHR Hansen)  | 15.0 | <ul style="list-style-type: none"> <li>• White wine: improvement of the aromatic intensity and increasing of tropical fruit flavor: thiols y esters.</li> <li>• Red wine: more pronounced fruity and spicy notes.</li> <li>• Low production of volatile phenols, volatile acidity, H<sub>2</sub>S.</li> </ul> | <ul style="list-style-type: none"> <li>• Facilitates the malolactic fermentation.</li> <li>• Middle production of polysaccharides: mouth-feel.</li> </ul> | <a href="https://www.gusmerenterprises.com/wp-content/uploads/2015/05/Viniflora-MELODY-PDS.pdf">https://www.gusmerenterprises.com/wp-content/uploads/2015/05/Viniflora-MELODY-PDS.pdf</a> |

\* ADY (active dry yeast), FLY (fresh liquid yeast), CRY (cream yeast), AFY (active frozen yeast), ENCY (encapsulated yeast).
